# Supplementary material for: Osteoarthritis of the Temporomandibular Joint can be diagnosed earlier using biomarkers and machine learning
Source: PubMed Central journal article supplement (PMC7228972; doi:10.1038/s41598-020-64942-0), 2020-05-15
Supplement: 41598_2020_64942_MOESM2_ESM.pdf [file 41598_2020_64942_MOESM2_ESM.pdf]

Supplemental materials: 3 figures.

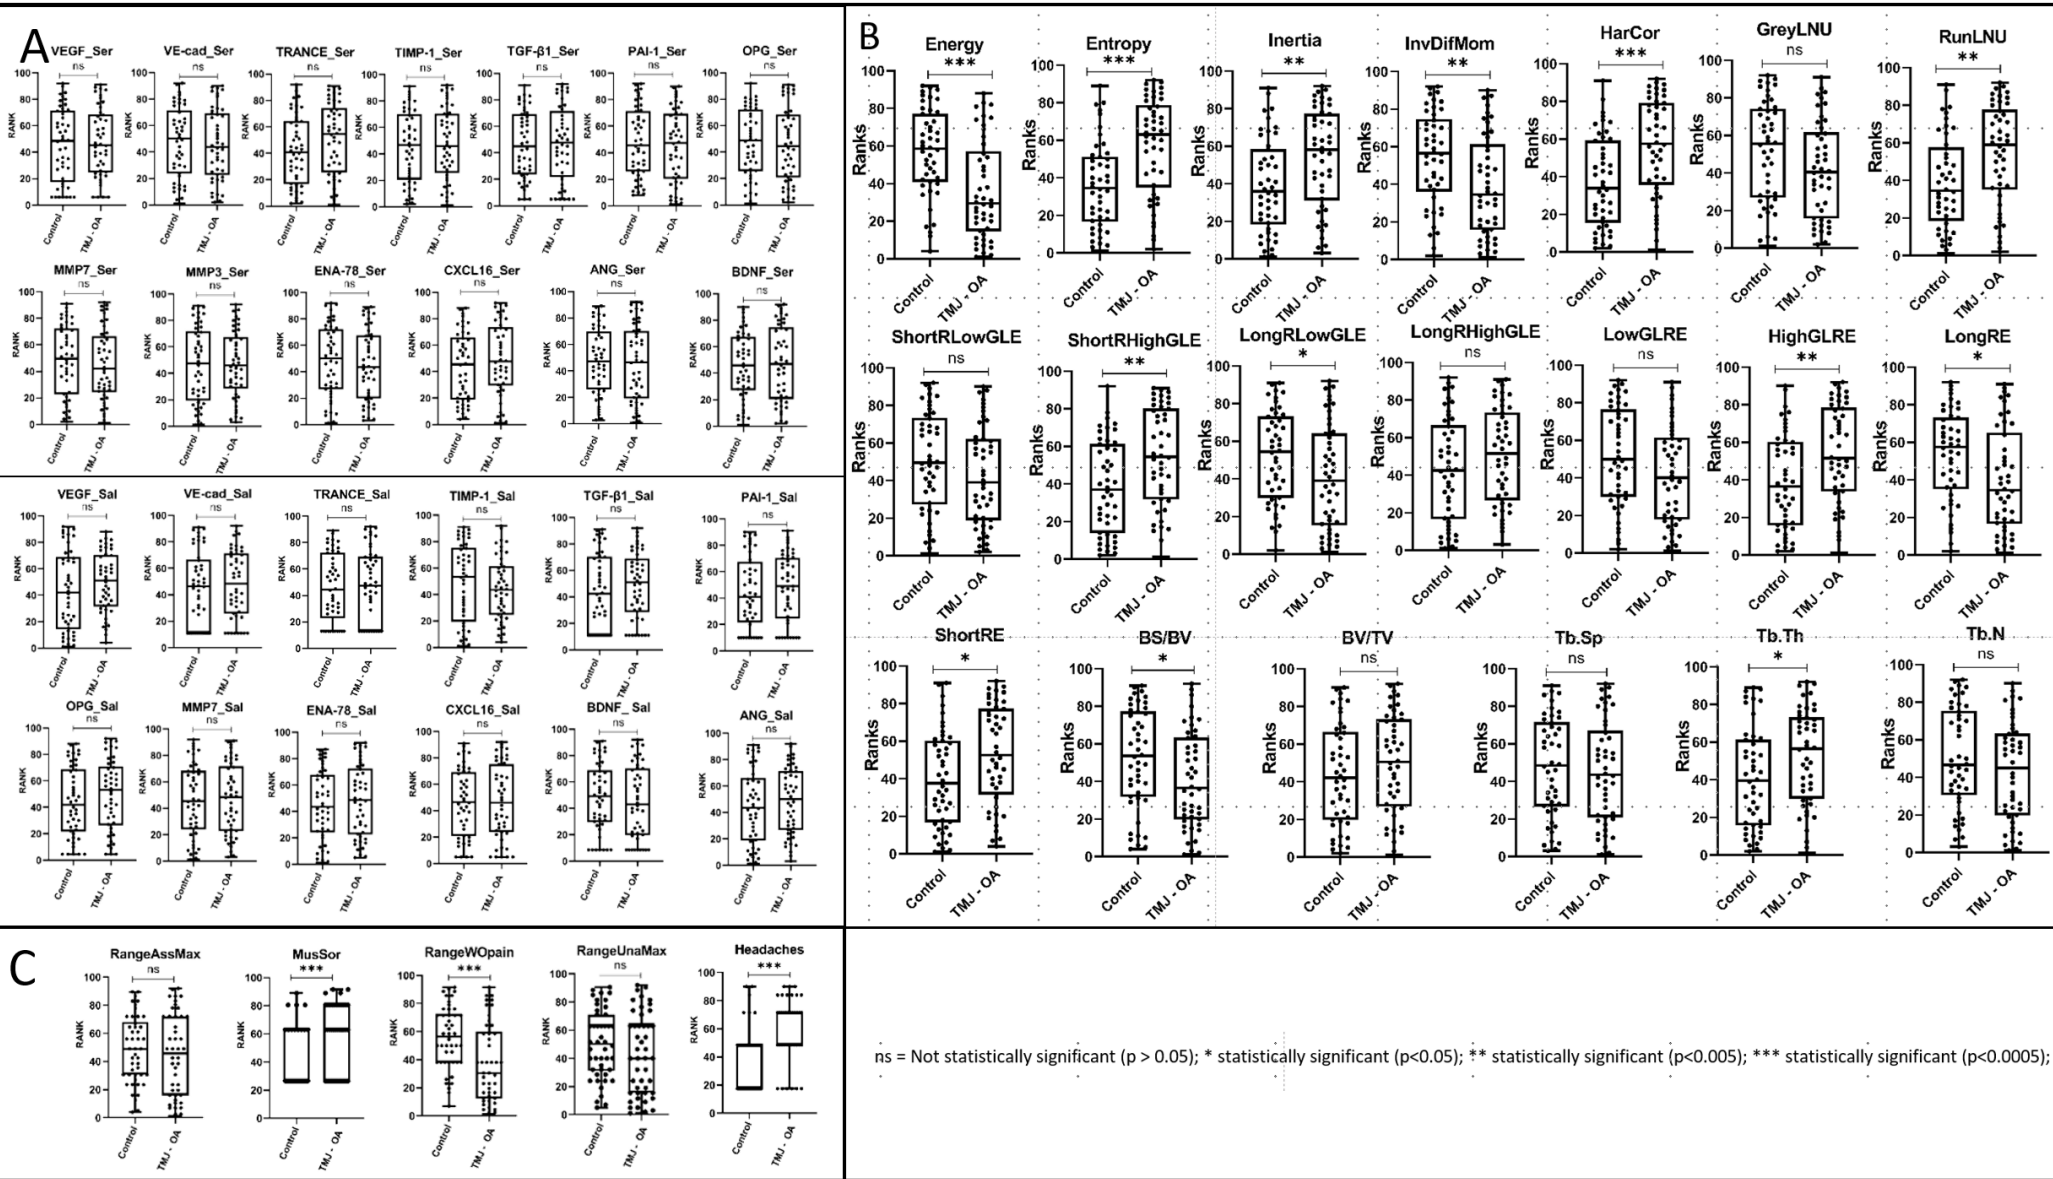

**Supplementary Figure 1** – Mann-Whitney U test for each biomarker. A- Proteins comparison using Mann–Whitney U test; B- Imaging comparison using Mann–Whitney U test; C- Clinical comparison using Mann–Whitney U test.

**A**

| Target      | LOD (pg/ml) | Best Confident Range | Maximum Value | Highest Reported Value | Lowest Reported Value | % Below LOD | LOD but <3xLOD | % in Best Confidence | % Above Maximum |
|-------------|-------------|----------------------|---------------|------------------------|-----------------------|-------------|----------------|----------------------|-----------------|
| 6ckine      | 4716.2      | 14,148.7 - 13,333    | 40,000        | 16,426.4               | 0.0                   | 98.8        | 1.0            | 0.3                  | 0.0             |
| Angiogenin  | 1.6         | 4.9 - 667            | 2,000         | 1,310.9                | 0.2                   | 0.3         | 0.0            | 99.8                 | 0.0             |
| BDNF        | 14.2        | 42.6 - 3,333         | 10,000        | 4,638.9                | 0.0                   | 42.0        | 15.8           | 42.3                 | 0.0             |
| CXCL16      | 12.6        | 37.9 - 3,333         | 10,000        | 4,497.6                | 0.0                   | 13.8        | 4.5            | 81.8                 | 0.0             |
| ENA-78      | 19.6        | 58.7 - 3,333         | 10,000        | 5,139.9                | 0.0                   | 3.3         | 8.5            | 88.3                 | 0.0             |
| MMP-3       | 16.9        | 50.8 - 10,000        | 30,000        | 3,081.2                | 0.0                   | 37.5        | 7.0            | 55.5                 | 0.0             |
| MMP-7       | 9.9         | 29.7 - 6,667         | 20,000        | 12,776.4               | 0.0                   | 2.3         | 0.8            | 97.0                 | 0.0             |
| OPG         | 124.2       | 372.5 - 6,667        | 20,000        | 10,509.1               | 0.0                   | 11.5        | 7.5            | 81.0                 | 0.0             |
| PAI-1       | 75.0        | 225.1 - 13,333       | 40,000        | 13,013.2               | 0.0                   | 34.0        | 10.8           | 55.3                 | 0.0             |
| TGFb1       | 125.3       | 375.8 - 6,667        | 20,000        | 801.5                  | 0.0                   | 79.8        | 19.0           | 1.3                  | 0.0             |
| TIMP-1      | 17.6        | 52.9 - 6,667         | 20,000        | 6,263.3                | 21.8                  | 0.0         | 0.3            | 99.8                 | 0.0             |
| TRANCE      | 219.1       | 657.3 - 33,333       | 100,000       | 7,032.7                | 0.0                   | 22.5        | 13.3           | 64.3                 | 0.0             |
| VE-Cadherin | 2297.8      | 6,893.4 - 66,667     | 200,000       | 18,249.7               | 0.0                   | 62.8        | 33.8           | 3.5                  | 0.0             |
| VEGF        | 43.6        | 130.9 - 3,333        | 10,000        | 3,137.1                | 0.0                   | 25.3        | 21.5           | 53.3                 | 0.0             |

**B**

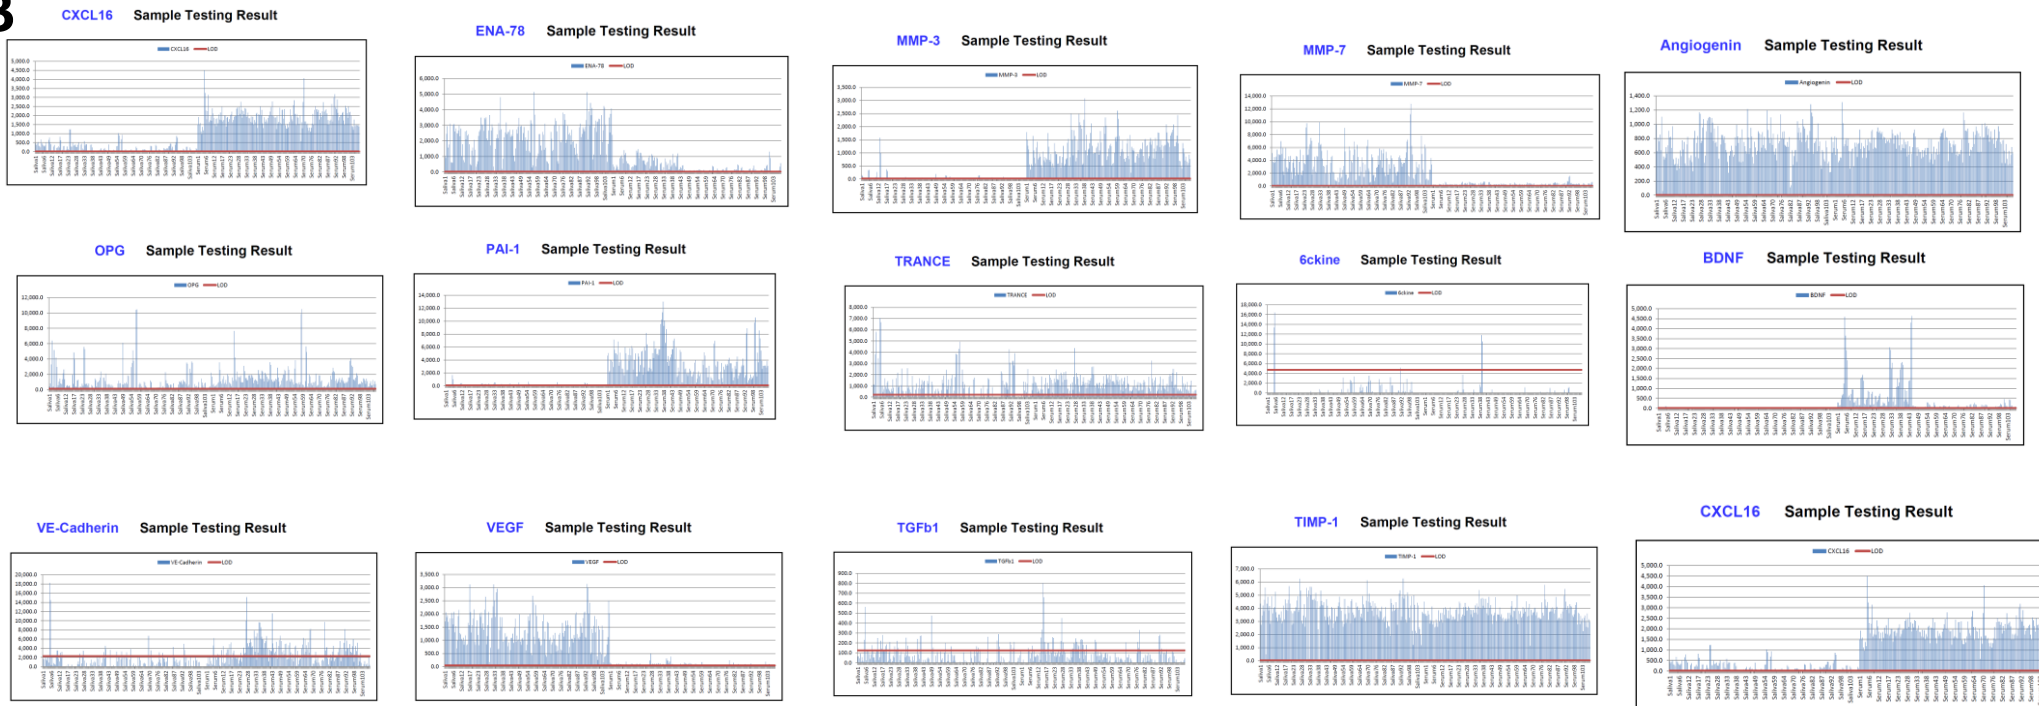

**Supplementary Figure 2.A-** Summary report for each protein in serum and saliva and LOD: limit of detection; B. Values in a graph bar for each subject, saliva and serum separately.

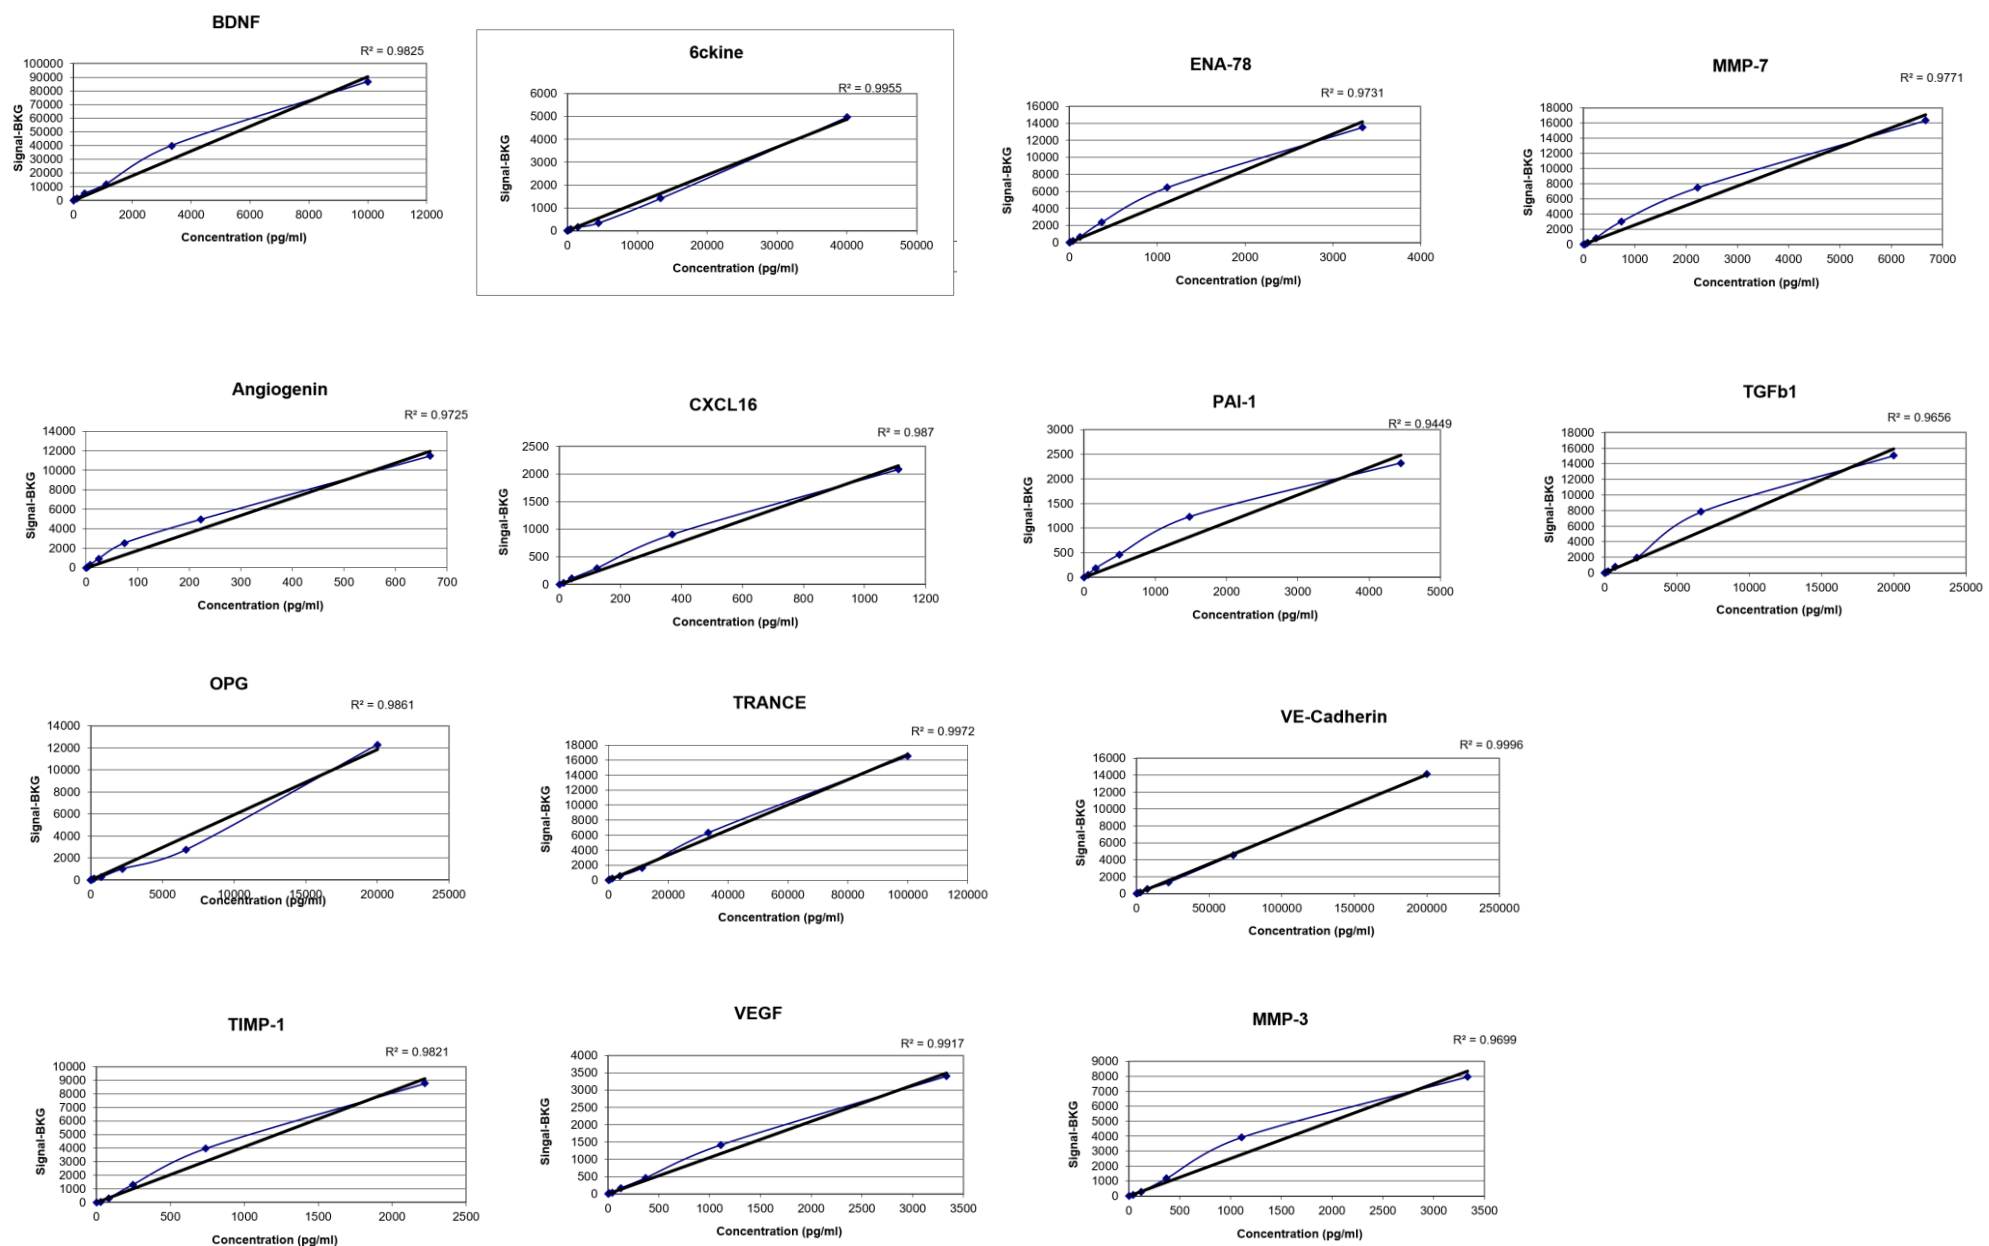

Supplementary Figure 3. Micro-array standard curves for each protein
